# Supplementary material for: São Paulo urban heat islands have a higher incidence of dengue than other urban areas
Source: PubMed Central journal article supplement — Braz J Infect Dis. 2014 Dec 15;19(2):146–55. doi: 10.1016/j.bjid.2014.10.004 (PMC9425226; doi:10.1016/j.bjid.2014.10.004), 2014-12-15
Supplement: mmc2.pdf [file mmc2.pdf]

Supplementary information: Table S2 - Dengue Incidence and socioeconomic aspects from ADs of São Paulo.

| District | Total area (Km <sup>2</sup> ) | Dengue Incidence / 100,000 hab. | Population density / Km <sup>2</sup> | (% of Slum-like areas) | (% of Monthly household income* |          |           |           |        | (% Land use pattern |       |           |        |
|----------|-------------------------------|---------------------------------|--------------------------------------|------------------------|---------------------------------|----------|-----------|-----------|--------|---------------------|-------|-----------|--------|
|          |                               |                                 |                                      |                        | ≤ 510                           | 511-1275 | 1276-2550 | 2551-5100 | > 5100 | Res-H               | Res_B | wasteland | NotRes |
| 1        | 7.2                           | 49.4                            | 11,840                               | 0.0                    | 21.9                            | 28.8     | 26.1      | 16.6      | 6.7    | 57.0                | 4.3   | 4.7       | 34.0   |
| 2        | 7.5                           | 99.7                            | 5,779                                | 0.0                    | 10.5                            | 11.7     | 17.9      | 23.0      | 36.7   | 54.4                | 9.6   | 9.4       | 26.6   |
| 3        | 33.6                          | 12.1                            | 1,960                                | 0.3                    | 35.8                            | 45.7     | 15.3      | 2.7       | 0.4    | 37.6                | 0.0   | 52.0      | 10.4   |
| 4        | 7.0                           | 25.7                            | 12,880                               | 0.7                    | 28.5                            | 37.3     | 23.7      | 8.7       | 1.7    | 57.8                | 1.6   | 8.7       | 31.9   |
| 5        | 6.5                           | 38.9                            | 16,167                               | 2.6                    | 26.8                            | 41.6     | 24.8      | 6.0       | 0.8    | 48.4                | 12.7  | 11.5      | 27.4   |
| 6        | 5.9                           | 7.0                             | 2,458                                | 0.4                    | 12.3                            | 21.1     | 23.8      | 23.8      | 19.0   | 3.3                 | 2.8   | 12.8      | 81.2   |
| 7        | 2.7                           | 25.9                            | 25,558                               | 0.0                    | 12.5                            | 24.4     | 28.2      | 20.9      | 13.4   | 8.9                 | 27.4  | 3.9       | 59.8   |
| 8        | 6.0                           | 39.9                            | 7,452                                | 0.2                    | 17.2                            | 30.1     | 28.2      | 18.2      | 6.4    | 20.9                | 4.3   | 9.7       | 65.1   |
| 9        | 4.2                           | 407.2                           | 8,158                                | 0.0                    | 30.2                            | 30.1     | 25.1      | 12.0      | 2.6    | 9.4                 | 4.0   | 2.1       | 84.4   |
| 10       | 3.6                           | 61.5                            | 8,064                                | 0.0                    | 24.5                            | 36.7     | 27.0      | 9.7       | 2.0    | 6.5                 | 5.8   | 2.8       | 84.9   |
| 11       | 21.1                          | 75.9                            | 12,568                               | 6.8                    | 40.3                            | 41.7     | 14.6      | 3.0       | 0.4    | 56.6                | 0.9   | 21.1      | 21.4   |
| 12       | 12.9                          | 317.4                           | 4,193                                | 0.2                    | 12.7                            | 19.9     | 26.0      | 25.0      | 16.4   | 25.6                | 3.0   | 3.6       | 67.8   |
| 13       | 13.5                          | 81.5                            | 10,597                               | 4.3                    | 31.1                            | 39.3     | 21.3      | 7.1       | 1.3    | 49.7                | 5.5   | 15.4      | 29.4   |
| 14       | 3.9                           | 54.1                            | 9,415                                | 0.0                    | 15.5                            | 26.5     | 27.1      | 20.6      | 10.2   | 22.0                | 6.1   | 4.0       | 68.0   |
| 15       | 8.8                           | 59.3                            | 7,498                                | 1.8                    | 14.1                            | 14.6     | 20.8      | 23.1      | 27.4   | 39.1                | 9.0   | 4.6       | 47.3   |
| 16       | 13.0                          | 63.5                            | 7,777                                | 0.7                    | 16.2                            | 23.7     | 25.7      | 22.1      | 12.2   | 31.1                | 7.8   | 7.9       | 53.3   |
| 17       | 12.6                          | 238.5                           | 16,775                               | 9.0                    | 31.9                            | 38.8     | 20.5      | 7.2       | 1.6    | 52.6                | 7.5   | 15.8      | 24.1   |
| 18       | 16.7                          | 49.8                            | 8,171                                | 1.4                    | 32.3                            | 38.0     | 21.6      | 7.1       | 1.1    | 62.2                | 5.1   | 11.8      | 20.9   |
| 19       | 13.8                          | 126.5                           | 19,517                               | 12.7                   | 38.5                            | 42.0     | 15.7      | 3.4       | 0.5    | 54.7                | 4.0   | 13.7      | 27.7   |
| 20       | 8.0                           | 58.8                            | 10,433                               | 0.0                    | 20.8                            | 30.4     | 26.8      | 16.2      | 5.8    | 48.3                | 3.7   | 3.3       | 44.7   |
| 21       | 7.2                           | 107.4                           | 11,887                               | 0.0                    | 22.7                            | 32.9     | 24.8      | 14.1      | 5.5    | 52.8                | 3.8   | 5.9       | 37.5   |
| 22       | 12.3                          | 100.1                           | 21,636                               | 11.0                   | 37.6                            | 39.0     | 16.1      | 5.6       | 1.5    | 63.3                | 4.0   | 7.5       | 25.2   |
| 23       | 28.0                          | 32.1                            | 7,022                                | 4.6                    | 31.2                            | 39.1     | 21.5      | 6.7       | 1.4    | 43.1                | 2.2   | 16.9      | 37.8   |
| 24       | 10.4                          | 24.5                            | 12,226                               | 4.8                    | 30.3                            | 38.7     | 22.5      | 7.4       | 1.0    | 42.1                | 1.4   | 29.6      | 27.0   |
| 25       | 14.9                          | 19.9                            | 14,170                               | 4.9                    | 45.4                            | 42.9     | 10.7      | 0.9       | 0.1    | 24.5                | 45.3  | 24.3      | 5.8    |
| 26       | 3.8                           | 34.9                            | 15,036                               | 0.0                    | 13.1                            | 17.7     | 24.8      | 22.5      | 21.7   | 15.4                | 26.7  | 2.4       | 55.5   |
| 27       | 12.0                          | 54.1                            | 9,072                                | 0.9                    | 19.4                            | 28.6     | 23.4      | 17.2      | 9.8    | 32.0                | 4.1   | 8.5       | 55.4   |
| 28       | 9.4                           | 75.7                            | 12,104                               | 2.5                    | 34.5                            | 38.7     | 19.9      | 6.1       | 0.7    | 49.5                | 1.9   | 14.3      | 34.3   |
| 29       | 11.0                          | 123.0                           | 12,919                               | 0.6                    | 23.3                            | 35.2     | 26.1      | 12.5      | 3.0    | 53.4                | 3.5   | 10.9      | 32.2   |
| 30       | 92.7                          | 20.0                            | 3,892                                | 5.9                    | 42.2                            | 42.6     | 13.0      | 1.9       | 0.2    | 50.8                | 1.6   | 28.7      | 18.9   |
| 31       | 9.0                           | 91.3                            | 11,586                               | 2.9                    | 40.6                            | 42.5     | 13.6      | 2.5       | 0.7    | 50.5                | 2.9   | 26.5      | 20.0   |
| 32       | 19.6                          | 21.1                            | 6,522                                | 0.9                    | 44.8                            | 41.6     | 11.8      | 1.6       | 0.2    | 41.1                | 0.0   | 28.3      | 30.6   |
| 33       | 11.0                          | 77.7                            | 9,710                                | 0.6                    | 20.4                            | 29.1     | 24.0      | 16.7      | 9.7    | 28.3                | 6.2   | 6.3       | 59.2   |
| 34       | 10.0                          | 138.3                           | 9,233                                | 0.3                    | 12.0                            | 11.6     | 19.3      | 25.9      | 31.0   | 28.4                | 15.8  | 6.3       | 49.5   |
| 35       | 12.1                          | 27.7                            | 18,456                               | 5.4                    | 45.5                            | 40.5     | 11.9      | 1.9       | 0.2    | 59.4                | 2.5   | 15.8      | 22.3   |

\* US\$

continue...

| District | Total area (Km <sup>2</sup> ) | Dengue Incidence / 100,000 hab. | Population density / Km <sup>2</sup> | (% of Slum-like areas) | (% of Monthly household income* |          |           |           |        | (% Land use pattern |       |           |        |
|----------|-------------------------------|---------------------------------|--------------------------------------|------------------------|---------------------------------|----------|-----------|-----------|--------|---------------------|-------|-----------|--------|
|          |                               |                                 |                                      |                        | ≤ 510                           | 511-1275 | 1276-2550 | 2551-5100 | > 5100 | Res-H               | Res_B | wasteland | NotRes |
| 36       | 14.6                          | 100.6                           | 13,996                               | 2.1                    | 33.5                            | 39.6     | 20.5      | 5.6       | 0.7    | 48.4                | 3.9   | 25.9      | 21.8   |
| 37       | 14.0                          | 114.8                           | 15,954                               | 4.4                    | 23.9                            | 31.4     | 23.1      | 14.9      | 6.7    | 50.0                | 6.6   | 7.2       | 36.3   |
| 38       | 7.5                           | 143.7                           | 12,680                               | 4.0                    | 31.2                            | 37.9     | 21.3      | 7.9       | 1.8    | 57.7                | 1.9   | 5.8       | 34.5   |
| 39       | 4.6                           | 184.8                           | 5,441                                | 0.0                    | 23.7                            | 34.0     | 26.7      | 12.5      | 3.0    | 34.9                | 0.5   | 7.6       | 57.0   |
| 40       | 6.5                           | 54.1                            | 7,638                                | 5.2                    | 24.3                            | 30.8     | 22.5      | 16.2      | 6.1    | 23.1                | 4.2   | 20.1      | 52.7   |
| 41       | 28.3                          | 22.2                            | 6,528                                | 2.5                    | 33.8                            | 43.5     | 18.3      | 3.8       | 0.5    | 46.8                | 3.6   | 21.9      | 27.7   |
| 42       | 37.7                          | 52.5                            | 7,842                                | 9.3                    | 46.5                            | 40.9     | 10.8      | 1.6       | 0.2    | 52.7                | 0.2   | 32.8      | 14.2   |
| 43       | 9.1                           | 93.3                            | 14,769                               | 20.9                   | 47.7                            | 38.6     | 11.5      | 1.9       | 0.2    | 49.2                | 0.4   | 28.6      | 21.8   |
| 44       | 6.2                           | 15.8                            | 14,337                               | 0.0                    | 12.1                            | 10.8     | 20.0      | 25.7      | 31.0   | 25.8                | 27.5  | 1.7       | 45.0   |
| 45       | 25.7                          | 54.9                            | 10,421                               | 5.3                    | 36.2                            | 42.1     | 16.7      | 4.3       | 0.6    | 43.7                | 2.1   | 24.9      | 29.3   |
| 46       | 14.6                          | 23.4                            | 8,488                                | 0.7                    | 34.0                            | 43.8     | 18.7      | 3.3       | 0.2    | 30.7                | 22.3  | 12.0      | 35.0   |
| 47       | 8.8                           | 37.7                            | 18,664                               | 5.8                    | 45.7                            | 41.9     | 10.8      | 1.4       | 0.1    | 55.2                | 0.8   | 26.6      | 17.4   |
| 48       | 10.3                          | 86.7                            | 6,393                                | 0.1                    | 12.8                            | 20.2     | 24.6      | 23.6      | 18.6   | 33.8                | 5.9   | 3.1       | 57.2   |
| 49       | 3.7                           | 66.6                            | 18,926                               | 0.0                    | 16.0                            | 25.3     | 26.1      | 20.5      | 12.0   | 24.3                | 17.9  | 2.8       | 54.9   |
| 50       | 6.5                           | 108.4                           | 12,426                               | 0.9                    | 22.5                            | 36.0     | 26.3      | 12.3      | 2.8    | 49.5                | 4.6   | 5.9       | 40.0   |
| 51       | 13.2                          | 26.0                            | 8,121                                | 0.2                    | 19.3                            | 30.7     | 27.4      | 16.7      | 6.0    | 39.0                | 7.6   | 26.8      | 26.5   |
| 52       | 208.2                         | 0.0                             | 40                                   | 0.0                    | 57.3                            | 33.5     | 7.9       | 1.1       | 0.2    | 23.6                | 0.0   | 75.8      | 0.6    |
| 53       | 9.1                           | 19.2                            | 9,183                                | 0.0                    | 10.2                            | 8.7      | 16.7      | 24.3      | 39.5   | 18.4                | 18.1  | 2.4       | 61.2   |
| 54       | 7.9                           | 40.9                            | 9,528                                | 0.0                    | 13.9                            | 23.9     | 27.7      | 22.1      | 12.4   | 26.8                | 8.6   | 8.5       | 56.2   |
| 55       | 11.5                          | 125.6                           | 4,087                                | 1.4                    | 17.8                            | 15.9     | 14.6      | 17.2      | 34.2   | 52.1                | 6.9   | 15.8      | 25.1   |
| 56       | 152.6                         | 13.7                            | 860                                  | 0.4                    | 49.1                            | 39.0     | 10.0      | 1.7       | 0.3    | 41.1                | 0.0   | 47.2      | 11.8   |
| 57       | 2.7                           | 219.7                           | 6,338                                | 0.2                    | 28.3                            | 35.8     | 23.0      | 9.3       | 3.6    | 20.6                | 2.0   | 3.9       | 73.4   |
| 58       | 15.5                          | 27.8                            | 4,418                                | 1.4                    | 34.9                            | 37.3     | 19.6      | 6.5       | 1.6    | 43.9                | 1.0   | 18.2      | 36.9   |
| 59       | 18.0                          | 70.0                            | 8,034                                | 9.9                    | 39.6                            | 41.2     | 15.1      | 3.5       | 0.7    | 46.6                | 0.7   | 29.0      | 23.8   |
| 60       | 11.3                          | 44.6                            | 11,330                               | 0.4                    | 22.8                            | 34.1     | 26.7      | 13.2      | 3.2    | 60.8                | 2.8   | 6.6       | 29.8   |
| 61       | 6.3                           | 38.7                            | 17,541                               | 0.0                    | 9.3                             | 14.5     | 22.3      | 26.9      | 26.9   | 45.6                | 21.4  | 2.2       | 30.9   |
| 62       | 23.7                          | 140.9                           | 3,389                                | 6.0                    | 42.6                            | 40.3     | 14.0      | 2.8       | 0.3    | 58.1                | 0.0   | 13.4      | 28.5   |
| 63       | 8.3                           | 45.9                            | 7,858                                | 0.0                    | 13.3                            | 14.1     | 21.6      | 24.9      | 26.0   | 38.5                | 13.3  | 5.1       | 43.1   |
| 64       | 17.1                          | 31.0                            | 9,808                                | 2.5                    | 26.2                            | 34.2     | 24.1      | 12.2      | 3.3    | 53.3                | 4.0   | 15.2      | 27.4   |
| 65       | 6.7                           | 102.2                           | 14,094                               | 2.9                    | 29.4                            | 37.2     | 23.3      | 8.4       | 1.7    | 67.7                | 1.9   | 6.3       | 24.1   |
| 66       | 12.4                          | 143.8                           | 8,060                                | 2.2                    | 29.8                            | 38.8     | 20.9      | 8.2       | 2.3    | 28.3                | 4.0   | 14.8      | 52.9   |
| 67       | 2.4                           | 21.1                            | 24,038                               | 0.0                    | 19.9                            | 36.8     | 28.1      | 11.4      | 3.8    | 1.9                 | 16.7  | 3.3       | 78.1   |
| 68       | 9.6                           | 77.7                            | 12,389                               | 4.6                    | 23.5                            | 30.4     | 21.4      | 15.4      | 8.5    | 53.9                | 7.4   | 16.2      | 22.6   |
| 69       | 14.6                          | 44.4                            | 17,025                               | 7.1                    | 26.1                            | 36.2     | 23.7      | 11.1      | 2.4    | 37.8                | 8.3   | 15.8      | 38.1   |

\* US\$

continue...

| District | Total area (Km <sup>2</sup> ) | Dengue Incidence / 100,000 hab. | Population density / Km <sup>2</sup> | (% of Slum-like areas) | (% of Monthly household income* |          |           |           |        | (% Land use pattern |       |           |        |
|----------|-------------------------------|---------------------------------|--------------------------------------|------------------------|---------------------------------|----------|-----------|-----------|--------|---------------------|-------|-----------|--------|
|          |                               |                                 |                                      |                        | ≤ 510                           | 511-1275 | 1276-2550 | 2551-5100 | > 5100 | Res-H               | Res_B | wasteland | NotRes |
| 70       | 3.8                           | 33.4                            | 21,817                               | 0.5                    | 16.7                            | 26.8     | 26.9      | 18.5      | 11.1   | 8.3                 | 24.7  | 4.2       | 62.8   |
| 71       | 13.1                          | 44.6                            | 9,075                                | 0.0                    | 13.6                            | 22.4     | 26.0      | 23.1      | 14.7   | 30.2                | 8.9   | 3.3       | 57.5   |
| 72       | 16.0                          | 47.5                            | 4,463                                | 0.0                    | 12.4                            | 15.8     | 21.8      | 23.3      | 26.6   | 39.2                | 5.6   | 8.3       | 46.9   |
| 73       | 9.9                           | 35.4                            | 8,586                                | 2.7                    | 28.9                            | 34.5     | 21.7      | 11.1      | 3.7    | 44.8                | 1.8   | 19.8      | 33.6   |
| 74       | 9.7                           | 40.0                            | 14,700                               | 1.0                    | 25.1                            | 36.0     | 26.6      | 10.6      | 1.6    | 56.9                | 4.7   | 6.9       | 31.5   |
| 75       | 12.8                          | 40.6                            | 12,103                               | 4.0                    | 35.3                            | 39.4     | 20.0      | 4.8       | 0.6    | 54.5                | 3.4   | 17.2      | 24.9   |
| 76       | 8.6                           | 82.5                            | 10,668                               | 23.4                   | 37.5                            | 38.8     | 18.0      | 5.0       | 0.8    | 53.5                | 0.7   | 8.2       | 37.5   |
| 77       | 13.1                          | 27.1                            | 11,010                               | 11.4                   | 43.5                            | 40.2     | 13.6      | 2.3       | 0.3    | 71.1                | 0.3   | 12.9      | 15.7   |
| 78       | 13.6                          | 26.0                            | 20,899                               | 7.3                    | 36.9                            | 42.3     | 17.0      | 3.3       | 0.3    | 56.1                | 5.5   | 19.0      | 19.4   |
| 79       | 9.3                           | 33.6                            | 14,045                               | 0.2                    | 12.1                            | 17.7     | 23.8      | 26.8      | 19.4   | 53.1                | 12.1  | 3.0       | 31.7   |
| 80       | 2.2                           | 63.4                            | 10,782                               | 0.0                    | 25.7                            | 42.2     | 25.5      | 5.7       | 0.9    | 3.5                 | 6.2   | 3.8       | 86.6   |
| 81       | 12.0                          | 21.2                            | 3,158                                | 0.2                    | 17.4                            | 26.1     | 26.3      | 15.7      | 6.3    | 37.5                | 2.6   | 11.9      | 48.1   |
| 82       | 8.5                           | 30.5                            | 10,769                               | 0.5                    | 13.2                            | 20.1     | 26.2      | 25.4      | 15.0   | 31.6                | 11.3  | 4.4       | 52.7   |
| 83       | 57.8                          | 36.5                            | 3,410                                | 1.7                    | 32.1                            | 39.8     | 18.5      | 6.9       | 2.6    | 56.6                | 1.0   | 22.7      | 19.7   |
| 84       | 9.5                           | 123.9                           | 10,407                               | 0.0                    | 18.0                            | 30.1     | 29.2      | 17.1      | 5.6    | 52.7                | 4.8   | 7.9       | 34.6   |
| 85       | 10.3                          | 140.9                           | 12,324                               | 11.5                   | 30.2                            | 28.3     | 11.6      | 11.6      | 18.3   | 17.0                | 20.2  | 41.5      | 21.4   |
| 86       | 9.5                           | 48.3                            | 15,753                               | 4.7                    | 41.3                            | 40.5     | 15.0      | 2.9       | 0.4    | 66.7                | 0.7   | 10.8      | 21.9   |
| 87       | 7.4                           | 28.5                            | 12,827                               | 0.2                    | 24.1                            | 31.3     | 23.9      | 13.5      | 7.1    | 53.9                | 5.6   | 5.9       | 34.6   |
| 88       | 7.2                           | 60.7                            | 7,546                                | 0.0                    | 19.9                            | 31.9     | 27.2      | 15.2      | 5.7    | 30.8                | 2.8   | 5.8       | 60.6   |
| 89       | 8.3                           | 54.8                            | 17,200                               | 13.1                   | 40.3                            | 39.5     | 15.7      | 3.7       | 0.6    | 54.7                | 1.4   | 20.5      | 23.4   |
| 90       | 7.0                           | 38.0                            | 5,647                                | 0.9                    | 11.6                            | 16.0     | 19.6      | 25.3      | 27.3   | 19.3                | 6.1   | 11.3      | 63.4   |
| 91       | 11.8                          | 96.9                            | 9,581                                | 1.8                    | 31.3                            | 37.7     | 20.4      | 8.0       | 2.4    | 35.0                | 1.6   | 7.2       | 56.2   |
| 92       | 8.6                           | 16.9                            | 15,180                               | 0.1                    | 8.8                             | 13.6     | 21.9      | 26.3      | 27.3   | 31.4                | 22.8  | 4.1       | 41.8   |
| 93       | 8.8                           | 55.3                            | 11,970                               | 0.1                    | 24.1                            | 34.1     | 25.9      | 13.0      | 2.9    | 66.1                | 2.1   | 5.1       | 26.7   |
| 94       | 7.9                           | 81.6                            | 16,539                               | 1.1                    | 29.9                            | 39.4     | 22.0      | 7.4       | 1.3    | 58.9                | 1.8   | 5.0       | 34.3   |
| 95       | 9.6                           | 41.3                            | 10,877                               | 0.8                    | 23.9                            | 32.5     | 23.9      | 14.2      | 5.4    | 50.3                | 4.0   | 12.6      | 33.0   |
| 96       | 10.0                          | 181.7                           | 10,817                               | 4.5                    | 18.7                            | 25.4     | 21.9      | 19.4      | 14.4   | 43.6                | 11.5  | 16.8      | 28.0   |

\* US\$

Demographic data was obtained from the 2010 census database from the Brazilian Institute of Geography and Statistics (IBGE). Population density and proportion of slum-like areas from ADs of São Paulo were calculated using the SPRING 5.1.7 geographical information system (National Institute for Space Research – INPE, Brazil). Res-H = predominantly residential houses; Res-B = predominantly residential buildings; NotRes = minimal residential use (typically commercial or industrial), wasteland = vacant lots.
