# Supplementary material for: São Paulo urban heat islands have a higher incidence of dengue than other urban areas
Source: PubMed Central journal article supplement — Braz J Infect Dis. 2014 Dec 15;19(2):146–55. doi: 10.1016/j.bjid.2014.10.004 (PMC9425226; doi:10.1016/j.bjid.2014.10.004), 2014-12-15
Supplement: mmc3.pdf [file mmc3.pdf]

Supplementary information: Table S3 - Dengue Incidence and environmental aspects from ADs of São Paulo.

| District | Total area (Km <sup>2</sup> ) | Dengue Incidence / 100,000 hab. | (% of Vegetation cover categories) |          |      | (% of Land surface temperature) |         |         |         |         |         |         |         |         |         |
|----------|-------------------------------|---------------------------------|------------------------------------|----------|------|---------------------------------|---------|---------|---------|---------|---------|---------|---------|---------|---------|
|          |                               |                                 | Low                                | Moderate | High | 20-22°C                         | 22-24°C | 24-26°C | 26-28°C | 28-30°C | 30-32°C | 32-34°C | 34-36°C | 36-38°C | 38-40°C |
| 1        | 7.2                           | 49.4                            | 88.9                               | 11.1     | 0.0  | 0.0                             | 0.0     | 0.0     | 2.4     | 24.3    | 71.7    | 1.6     | 0.0     | 0.0     | 0.0     |
| 2        | 7.5                           | 99.7                            | 61.8                               | 32.4     | 2.0  | 0.0                             | 0.0     | 0.0     | 40.2    | 53.6    | 6.2     | 0.0     | 0.0     | 0.0     | 0.0     |
| 3        | 33.6                          | 12.1                            | 16.9                               | 16.8     | 63.7 | 0.3                             | 29.3    | 25.8    | 30.2    | 12.7    | 1.7     | 0.0     | 0.0     | 0.0     | 0.0     |
| 4        | 7.0                           | 25.7                            | 94.8                               | 5.1      | 0.1  | 0.0                             | 0.0     | 0.0     | 0.0     | 12.2    | 83.9    | 3.9     | 0.0     | 0.0     | 0.0     |
| 5        | 6.5                           | 38.9                            | 91.2                               | 8.8      | 0.0  | 0.0                             | 0.0     | 0.0     | 2.0     | 67.8    | 30.2    | 0.0     | 0.0     | 0.0     | 0.0     |
| 6        | 5.9                           | 7.0                             | 83.0                               | 9.8      | 1.8  | 0.0                             | 0.0     | 0.0     | 1.7     | 21.9    | 60.0    | 15.5    | 1.0     | 0.0     | 0.0     |
| 7        | 2.7                           | 25.9                            | 65.0                               | 34.5     | 0.0  | 0.0                             | 0.0     | 0.0     | 42.9    | 43.9    | 13.2    | 0.0     | 0.0     | 0.0     | 0.0     |
| 8        | 6.0                           | 39.9                            | 90.5                               | 6.1      | 0.2  | 0.0                             | 0.0     | 0.0     | 1.9     | 36.1    | 57.5    | 4.5     | 0.0     | 0.0     | 0.0     |
| 9        | 4.2                           | 407.2                           | 81.3                               | 13.4     | 1.9  | 0.0                             | 0.0     | 0.0     | 1.7     | 26.4    | 59.0    | 12.8    | 0.0     | 0.0     | 0.0     |
| 10       | 3.6                           | 61.5                            | 93.2                               | 6.1      | 0.0  | 0.0                             | 0.0     | 0.0     | 0.0     | 9.9     | 63.5    | 26.6    | 0.0     | 0.0     | 0.0     |
| 11       | 21.1                          | 75.9                            | 42.3                               | 11.1     | 46.2 | 4.8                             | 31.7    | 6.1     | 7.8     | 16.6    | 29.7    | 3.3     | 0.0     | 0.0     | 0.0     |
| 12       | 12.9                          | 317.4                           | 48.6                               | 37.3     | 10.3 | 0.0                             | 0.0     | 5.2     | 21.4    | 54.3    | 18.8    | 0.1     | 0.1     | 0.0     | 0.0     |
| 13       | 13.5                          | 81.5                            | 45.4                               | 10.3     | 43.8 | 1.9                             | 32.6    | 6.2     | 6.2     | 25.2    | 27.0    | 1.0     | 0.0     | 0.0     | 0.0     |
| 14       | 3.9                           | 54.1                            | 79.1                               | 18.5     | 0.0  | 0.0                             | 0.0     | 0.0     | 0.7     | 21.3    | 59.2    | 18.4    | 0.4     | 0.0     | 0.0     |
| 15       | 8.8                           | 59.3                            | 63.9                               | 34.5     | 0.0  | 0.0                             | 0.0     | 0.5     | 13.3    | 46.6    | 30.6    | 9.0     | 0.0     | 0.0     | 0.0     |
| 16       | 13.0                          | 63.5                            | 63.7                               | 27.8     | 5.6  | 0.0                             | 0.0     | 1.8     | 18.8    | 39.0    | 39.0    | 1.5     | 0.0     | 0.0     | 0.0     |
| 17       | 12.6                          | 238.5                           | 80.2                               | 16.4     | 2.8  | 0.0                             | 0.0     | 0.2     | 7.4     | 49.7    | 41.9    | 0.8     | 0.0     | 0.0     | 0.0     |
| 18       | 16.7                          | 49.8                            | 54.2                               | 21.0     | 20.2 | 0.0                             | 5.2     | 15.3    | 12.7    | 40.1    | 26.7    | 0.0     | 0.0     | 0.0     | 0.0     |
| 19       | 13.8                          | 126.5                           | 82.4                               | 15.7     | 1.5  | 0.0                             | 0.0     | 0.3     | 3.5     | 48.1    | 48.0    | 0.1     | 0.0     | 0.0     | 0.0     |
| 20       | 8.0                           | 58.8                            | 86.6                               | 12.9     | 0.5  | 0.0                             | 0.0     | 0.0     | 3.6     | 23.7    | 71.8    | 0.9     | 0.0     | 0.0     | 0.0     |
| 21       | 7.2                           | 107.4                           | 85.9                               | 13.0     | 0.5  | 0.0                             | 0.2     | 0.6     | 5.2     | 24.6    | 63.3    | 6.2     | 0.0     | 0.0     | 0.0     |
| 22       | 12.3                          | 100.1                           | 78.3                               | 21.4     | 0.2  | 0.0                             | 0.0     | 0.0     | 1.1     | 40.0    | 57.4    | 1.5     | 0.0     | 0.0     | 0.0     |
| 23       | 28.0                          | 32.1                            | 43.6                               | 15.9     | 20.3 | 0.0                             | 18.8    | 13.1    | 17.3    | 28.1    | 22.6    | 0.1     | 0.0     | 0.0     | 0.0     |
| 24       | 10.4                          | 24.5                            | 77.1                               | 15.2     | 5.6  | 0.0                             | 0.1     | 5.3     | 14.3    | 54.1    | 24.9    | 1.3     | 0.0     | 0.0     | 0.0     |
| 25       | 14.9                          | 19.9                            | 56.0                               | 22.6     | 20.6 | 0.0                             | 3.7     | 14.9    | 32.6    | 45.0    | 3.9     | 0.0     | 0.0     | 0.0     | 0.0     |
| 26       | 3.8                           | 34.9                            | 42.9                               | 55.7     | 1.0  | 0.0                             | 0.0     | 5.7     | 48.3    | 46.0    | 0.0     | 0.0     | 0.0     | 0.0     | 0.0     |
| 27       | 12.0                          | 54.1                            | 56.3                               | 9.2      | 33.3 | 0.0                             | 8.2     | 22.2    | 7.6     | 29.3    | 32.2    | 0.4     | 0.0     | 0.0     | 0.0     |
| 28       | 9.4                           | 75.7                            | 75.1                               | 10.9     | 13.5 | 0.0                             | 1.1     | 8.3     | 6.1     | 39.9    | 44.3    | 0.3     | 0.0     | 0.0     | 0.0     |
| 29       | 11.0                          | 123.0                           | 76.5                               | 16.2     | 5.5  | 0.0                             | 0.3     | 3.1     | 4.6     | 21.2    | 64.0    | 6.7     | 0.1     | 0.0     | 0.0     |
| 30       | 92.7                          | 20.0                            | 20.1                               | 10.3     | 48.1 | 0.0                             | 35.8    | 33.8    | 13.8    | 13.3    | 3.2     | 0.0     | 0.0     | 0.0     | 0.0     |
| 31       | 9.0                           | 91.3                            | 70.1                               | 24.4     | 4.0  | 0.0                             | 0.0     | 8.2     | 32.0    | 52.9    | 7.0     | 0.0     | 0.0     | 0.0     | 0.0     |
| 32       | 19.6                          | 21.1                            | 38.1                               | 25.9     | 34.2 | 0.0                             | 10.6    | 24.9    | 35.8    | 23.7    | 5.0     | 0.0     | 0.0     | 0.0     | 0.0     |
| 33       | 11.0                          | 77.7                            | 83.8                               | 13.7     | 1.7  | 0.0                             | 0.0     | 0.0     | 3.2     | 24.0    | 61.0    | 11.6    | 0.1     | 0.0     | 0.0     |
| 34       | 10.0                          | 138.3                           | 58.8                               | 36.9     | 0.9  | 0.0                             | 0.0     | 0.1     | 24.8    | 53.9    | 21.1    | 0.0     | 0.0     | 0.0     | 0.0     |
| 35       | 12.1                          | 27.7                            | 95.7                               | 4.1      | 0.1  | 0.0                             | 0.0     | 0.0     | 4.5     | 72.5    | 23.0    | 0.0     | 0.0     | 0.0     | 0.0     |

\* US\$

continue...

| District | Total area (Km <sup>2</sup> ) | Dengue Incidence / 100,000 hab. | (% of Vegetation cover categories) |          |      | (% of Land surface temperature) |         |         |         |         |         |         |         |         |         |
|----------|-------------------------------|---------------------------------|------------------------------------|----------|------|---------------------------------|---------|---------|---------|---------|---------|---------|---------|---------|---------|
|          |                               |                                 | Low                                | Moderate | High | 20-22°C                         | 22-24°C | 24-26°C | 26-28°C | 28-30°C | 30-32°C | 32-34°C | 34-36°C | 36-38°C | 38-40°C |
| 36       | 14.6                          | 100.6                           | 88.2                               | 11.6     | 0.0  | 0.0                             | 0.0     | 0.0     | 1.7     | 76.1    | 22.2    | 0.0     | 0.0     | 0.0     | 0.0     |
| 37       | 14.0                          | 114.8                           | 76.1                               | 21.8     | 1.2  | 0.0                             | 0.0     | 0.7     | 6.5     | 40.0    | 50.7    | 2.0     | 0.1     | 0.0     | 0.0     |
| 38       | 7.5                           | 143.7                           | 82.7                               | 15.6     | 0.6  | 0.0                             | 0.0     | 0.2     | 7.0     | 28.7    | 63.5    | 0.6     | 0.0     | 0.0     | 0.0     |
| 39       | 4.6                           | 184.8                           | 86.1                               | 10.3     | 2.5  | 0.0                             | 0.0     | 0.0     | 3.8     | 38.7    | 56.9    | 0.6     | 0.0     | 0.0     | 0.0     |
| 40       | 6.5                           | 54.1                            | 78.4                               | 18.6     | 0.2  | 0.0                             | 0.0     | 0.0     | 3.1     | 42.8    | 50.6    | 3.5     | 0.0     | 0.0     | 0.0     |
| 41       | 28.3                          | 22.2                            | 41.4                               | 18.6     | 38.0 | 1.7                             | 16.1    | 19.4    | 22.7    | 32.1    | 7.9     | 0.2     | 0.0     | 0.0     | 0.0     |
| 42       | 37.7                          | 52.5                            | 34.4                               | 18.0     | 30.0 | 0.0                             | 20.7    | 19.4    | 26.2    | 23.6    | 10.2    | 0.0     | 0.0     | 0.0     | 0.0     |
| 43       | 9.1                           | 93.3                            | 75.7                               | 8.2      | 11.1 | 0.0                             | 0.5     | 6.5     | 12.8    | 45.6    | 34.6    | 0.0     | 0.0     | 0.0     | 0.0     |
| 44       | 6.2                           | 15.8                            | 56.5                               | 41.2     | 0.9  | 0.0                             | 0.0     | 7.3     | 59.0    | 33.7    | 0.0     | 0.0     | 0.0     | 0.0     | 0.0     |
| 45       | 25.7                          | 54.9                            | 41.4                               | 16.8     | 14.3 | 0.0                             | 26.5    | 12.6    | 8.1     | 22.0    | 30.3    | 0.4     | 0.0     | 0.0     | 0.0     |
| 46       | 14.6                          | 23.4                            | 38.0                               | 21.5     | 39.9 | 0.0                             | 5.7     | 29.3    | 32.1    | 25.8    | 7.0     | 0.1     | 0.0     | 0.0     | 0.0     |
| 47       | 8.8                           | 37.7                            | 87.1                               | 12.6     | 0.4  | 0.0                             | 0.0     | 0.0     | 19.8    | 72.4    | 7.9     | 0.0     | 0.0     | 0.0     | 0.0     |
| 48       | 10.3                          | 86.7                            | 82.6                               | 13.8     | 0.4  | 0.0                             | 0.0     | 0.0     | 2.2     | 35.6    | 50.5    | 11.1    | 0.6     | 0.0     | 0.0     |
| 49       | 3.7                           | 66.6                            | 83.4                               | 7.2      | 3.6  | 0.0                             | 0.0     | 2.0     | 14.7    | 63.1    | 18.3    | 2.0     | 0.0     | 0.0     | 0.0     |
| 50       | 6.5                           | 108.4                           | 85.3                               | 13.6     | 0.0  | 0.0                             | 0.0     | 0.0     | 0.2     | 15.0    | 77.2    | 7.6     | 0.0     | 0.0     | 0.0     |
| 51       | 13.2                          | 26.0                            | 37.6                               | 12.5     | 47.9 | 0.9                             | 30.8    | 15.4    | 11.5    | 25.3    | 15.9    | 0.3     | 0.0     | 0.0     | 0.0     |
| 52       | 208.2                         | 0.0                             | 0.4                                | 2.1      | 95.8 | 0.1                             | 57.1    | 40.7    | 2.1     | 0.0     | 0.0     | 0.0     | 0.0     | 0.0     | 0.0     |
| 53       | 9.1                           | 19.2                            | 48.7                               | 43.0     | 0.4  | 0.0                             | 0.0     | 6.6     | 36.2    | 48.9    | 8.2     | 0.0     | 0.0     | 0.0     | 0.0     |
| 54       | 7.9                           | 40.9                            | 80.5                               | 18.5     | 0.0  | 0.0                             | 0.0     | 0.0     | 7.6     | 33.6    | 52.1    | 6.5     | 0.2     | 0.0     | 0.0     |
| 55       | 11.5                          | 125.6                           | 20.9                               | 70.3     | 6.3  | 0.0                             | 0.0     | 4.3     | 55.2    | 37.8    | 2.6     | 0.1     | 0.0     | 0.0     | 0.0     |
| 56       | 152.6                         | 13.7                            | 4.6                                | 8.8      | 79.6 | 0.1                             | 35.2    | 50.1    | 12.5    | 1.9     | 0.1     | 0.0     | 0.0     | 0.0     | 0.0     |
| 57       | 2.7                           | 219.7                           | 82.6                               | 12.9     | 0.4  | 0.0                             | 0.0     | 0.0     | 0.5     | 22.2    | 72.0    | 5.3     | 0.0     | 0.0     | 0.0     |
| 58       | 15.5                          | 27.8                            | 31.3                               | 16.0     | 52.1 | 0.0                             | 21.3    | 26.7    | 23.0    | 25.6    | 3.4     | 0.0     | 0.0     | 0.0     | 0.0     |
| 59       | 18.0                          | 70.0                            | 35.9                               | 19.1     | 24.0 | 0.0                             | 22.3    | 20.5    | 21.4    | 23.8    | 12.1    | 0.0     | 0.0     | 0.0     | 0.0     |
| 60       | 11.3                          | 44.6                            | 89.9                               | 10.0     | 0.0  | 0.0                             | 0.0     | 0.0     | 0.3     | 52.5    | 47.3    | 0.0     | 0.0     | 0.0     | 0.0     |
| 61       | 6.3                           | 38.7                            | 87.5                               | 11.1     | 0.0  | 0.0                             | 0.0     | 0.0     | 23.0    | 62.0    | 15.0    | 0.0     | 0.0     | 0.0     | 0.0     |
| 62       | 23.7                          | 140.9                           | 26.5                               | 29.7     | 40.1 | 1.8                             | 12.1    | 20.3    | 29.5    | 29.0    | 6.7     | 0.4     | 0.1     | 0.0     | 0.0     |
| 63       | 8.3                           | 45.9                            | 62.6                               | 34.8     | 0.2  | 0.0                             | 0.0     | 0.0     | 30.2    | 59.8    | 10.1    | 0.0     | 0.0     | 0.0     | 0.0     |
| 64       | 17.1                          | 31.0                            | 61.3                               | 17.6     | 19.4 | 0.0                             | 2.5     | 7.4     | 17.5    | 37.4    | 34.5    | 0.7     | 0.0     | 0.0     | 0.0     |
| 65       | 6.7                           | 102.2                           | 94.1                               | 5.8      | 0.1  | 0.0                             | 0.0     | 0.0     | 0.9     | 43.9    | 55.2    | 0.0     | 0.0     | 0.0     | 0.0     |
| 66       | 12.4                          | 143.8                           | 52.5                               | 35.7     | 10.1 | 0.0                             | 0.8     | 8.3     | 26.6    | 37.8    | 26.2    | 0.2     | 0.0     | 0.0     | 0.0     |
| 67       | 2.4                           | 21.1                            | 33.2                               | 60.5     | 1.2  | 0.0                             | 0.0     | 0.6     | 35.0    | 46.0    | 18.4    | 0.0     | 0.0     | 0.0     | 0.0     |
| 68       | 9.6                           | 77.7                            | 78.7                               | 15.1     | 4.9  | 0.0                             | 0.0     | 2.5     | 9.3     | 39.0    | 47.5    | 1.6     | 0.0     | 0.0     | 0.0     |
| 69       | 14.6                          | 44.4                            | 79.0                               | 19.4     | 1.3  | 0.0                             | 0.0     | 0.1     | 3.9     | 37.4    | 57.5    | 1.1     | 0.0     | 0.0     | 0.0     |

\* US\$

continue...

| District | Total area (Km <sup>2</sup> ) | Dengue Incidence / 100,000 hab. | (% of Vegetation cover categories) |          |      | (% of Land surface temperature) |         |         |         |         |         |         |         |         |         |
|----------|-------------------------------|---------------------------------|------------------------------------|----------|------|---------------------------------|---------|---------|---------|---------|---------|---------|---------|---------|---------|
|          |                               |                                 | Low                                | Moderate | High | 20-22°C                         | 22-24°C | 24-26°C | 26-28°C | 28-30°C | 30-32°C | 32-34°C | 34-36°C | 36-38°C | 38-40°C |
| 70       | 3.8                           | 33.4                            | 85.0                               | 14.6     | 0.0  | 0.0                             | 0.0     | 2.3     | 10.6    | 31.7    | 44.5    | 10.6    | 0.4     | 0.0     | 0.0     |
| 71       | 13.1                          | 44.6                            | 69.2                               | 24.7     | 4.8  | 0.0                             | 0.0     | 0.7     | 9.7     | 51.0    | 37.0    | 1.1     | 0.3     | 0.0     | 0.2     |
| 72       | 16.0                          | 47.5                            | 47.8                               | 47.2     | 1.1  | 0.0                             | 0.0     | 3.6     | 22.6    | 44.1    | 26.1    | 3.6     | 0.0     | 0.0     | 0.0     |
| 73       | 9.9                           | 35.4                            | 77.6                               | 17.1     | 3.6  | 0.0                             | 0.0     | 1.8     | 11.9    | 55.7    | 30.1    | 0.6     | 0.0     | 0.0     | 0.0     |
| 74       | 9.7                           | 40.0                            | 85.4                               | 13.5     | 0.0  | 0.0                             | 0.0     | 0.0     | 1.5     | 28.8    | 68.5    | 1.2     | 0.0     | 0.0     | 0.0     |
| 75       | 12.8                          | 40.6                            | 81.2                               | 14.7     | 4.0  | 0.0                             | 0.0     | 0.1     | 4.2     | 33.9    | 61.0    | 0.8     | 0.0     | 0.0     | 0.0     |
| 76       | 8.6                           | 82.5                            | 80.2                               | 16.8     | 2.2  | 0.0                             | 0.0     | 2.8     | 2.8     | 50.7    | 43.6    | 0.0     | 0.0     | 0.0     | 0.0     |
| 77       | 13.1                          | 27.1                            | 68.3                               | 15.1     | 15.0 | 0.0                             | 2.5     | 13.4    | 27.3    | 37.9    | 18.9    | 0.0     | 0.0     | 0.0     | 0.0     |
| 78       | 13.6                          | 26.0                            | 86.5                               | 12.7     | 0.8  | 0.0                             | 0.0     | 0.0     | 1.5     | 37.8    | 60.6    | 0.1     | 0.0     | 0.0     | 0.0     |
| 79       | 9.3                           | 33.6                            | 80.8                               | 17.4     | 0.3  | 0.0                             | 0.0     | 0.0     | 4.4     | 63.3    | 32.1    | 0.2     | 0.0     | 0.0     | 0.0     |
| 80       | 2.2                           | 63.4                            | 45.1                               | 54.7     | 0.0  | 0.0                             | 0.0     | 0.0     | 11.7    | 44.2    | 41.6    | 2.6     | 0.0     | 0.0     | 0.0     |
| 81       | 12.0                          | 21.2                            | 43.2                               | 25.2     | 1.8  | 0.0                             | 23.7    | 4.2     | 14.3    | 25.1    | 28.6    | 4.1     | 0.0     | 0.0     | 0.0     |
| 82       | 8.5                           | 30.5                            | 78.4                               | 18.2     | 1.5  | 0.0                             | 0.0     | 0.2     | 5.2     | 49.2    | 44.8    | 0.3     | 0.2     | 0.0     | 0.0     |
| 83       | 57.8                          | 36.5                            | 20.3                               | 10.5     | 67.8 | 1.1                             | 45.1    | 17.4    | 16.1    | 15.6    | 4.7     | 0.1     | 0.0     | 0.0     | 0.0     |
| 84       | 9.5                           | 123.9                           | 69.1                               | 18.6     | 10.8 | 0.0                             | 1.1     | 8.4     | 8.7     | 30.7    | 50.7    | 0.5     | 0.0     | 0.0     | 0.0     |
| 85       | 10.3                          | 140.9                           | 22.4                               | 59.4     | 17.1 | 0.0                             | 0.1     | 24.1    | 47.0    | 16.9    | 10.9    | 1.0     | 0.0     | 0.0     | 0.0     |
| 86       | 9.5                           | 48.3                            | 92.6                               | 6.3      | 0.6  | 0.0                             | 0.0     | 0.3     | 5.0     | 64.7    | 30.0    | 0.0     | 0.0     | 0.0     | 0.0     |
| 87       | 7.4                           | 28.5                            | 84.5                               | 14.7     | 0.2  | 0.0                             | 0.0     | 0.6     | 8.0     | 41.6    | 49.5    | 0.4     | 0.0     | 0.0     | 0.0     |
| 88       | 7.2                           | 60.7                            | 93.5                               | 6.1      | 0.0  | 0.0                             | 0.0     | 0.4     | 2.2     | 31.4    | 58.8    | 7.0     | 0.2     | 0.0     | 0.0     |
| 89       | 8.3                           | 54.8                            | 89.8                               | 7.5      | 2.0  | 0.0                             | 0.0     | 0.0     | 1.7     | 53.9    | 44.4    | 0.0     | 0.0     | 0.0     | 0.0     |
| 90       | 7.0                           | 38.0                            | 77.4                               | 16.4     | 0.1  | 0.0                             | 0.0     | 0.0     | 7.8     | 43.6    | 34.6    | 11.7    | 2.3     | 0.0     | 0.0     |
| 91       | 11.8                          | 96.9                            | 89.1                               | 9.2      | 1.2  | 0.0                             | 0.0     | 0.0     | 2.2     | 35.0    | 61.2    | 1.6     | 0.0     | 0.0     | 0.0     |
| 92       | 8.6                           | 16.9                            | 60.5                               | 37.5     | 0.2  | 0.0                             | 0.0     | 1.5     | 23.6    | 62.2    | 12.3    | 0.3     | 0.0     | 0.0     | 0.0     |
| 93       | 8.8                           | 55.3                            | 94.6                               | 5.2      | 0.0  | 0.0                             | 0.0     | 0.0     | 0.0     | 53.1    | 46.9    | 0.0     | 0.0     | 0.0     | 0.0     |
| 94       | 7.9                           | 81.6                            | 94.5                               | 5.2      | 0.3  | 0.0                             | 0.0     | 0.0     | 1.3     | 5.0     | 88.5    | 5.2     | 0.0     | 0.0     | 0.0     |
| 95       | 9.6                           | 41.3                            | 83.8                               | 15.3     | 0.4  | 0.0                             | 0.0     | 0.0     | 2.7     | 35.0    | 59.9    | 2.3     | 0.2     | 0.0     | 0.0     |
| 96       | 10.0                          | 181.7                           | 65.9                               | 28.0     | 5.0  | 0.0                             | 0.0     | 5.7     | 15.9    | 44.9    | 32.9    | 0.6     | 0.0     | 0.0     | 0.0     |

\* US\$

Vegetal cover categories and land surface temperature ranges from ADs of São Paulo were calculated using the SPRING 5.1.7 geographical information system (National Institute for Space Research – INPE, Brazil).
